# Supplementary material for: Bisphenol A Diglycidyl Ether-Primary Amine Cooligomer-poly(ε-caprolactone) Networks: Synthesis and Characterization
Source: MDPI journal article supplement (doi:10.3390/polym15132937), 2023-07-03
Supplement: s1 [file s1]

# Supplementary Material: Bisphenol A Diglycidyl Ether-Primary Amine Cooligomer-poly( $\epsilon$ -caprolactone) Networks: Synthesis and Characterization

Katalin Czifrák, Csilla Lakatos, Gabriella Szabó, Bence Vadkerti, Lajos Daróczi, Miklós Zsuga and Sándor Kéki

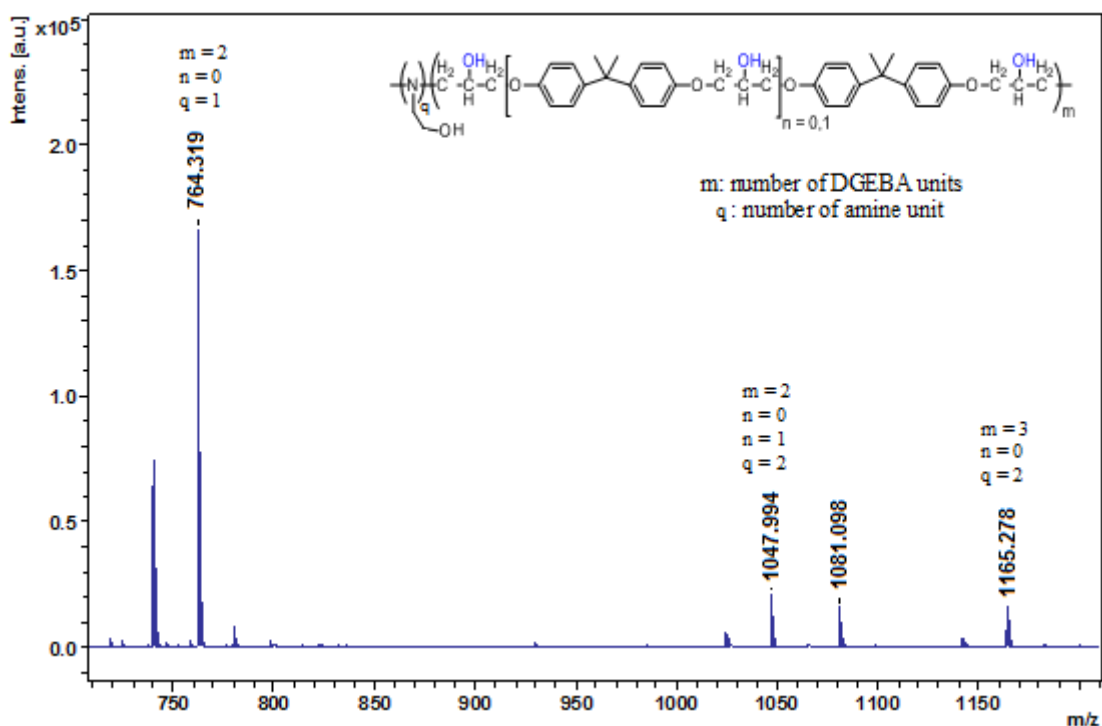

Figure S1. MALDI-TOF MS spectrum of DGEBA-EA / 1:0.2 cooligomer after 2 hrs.

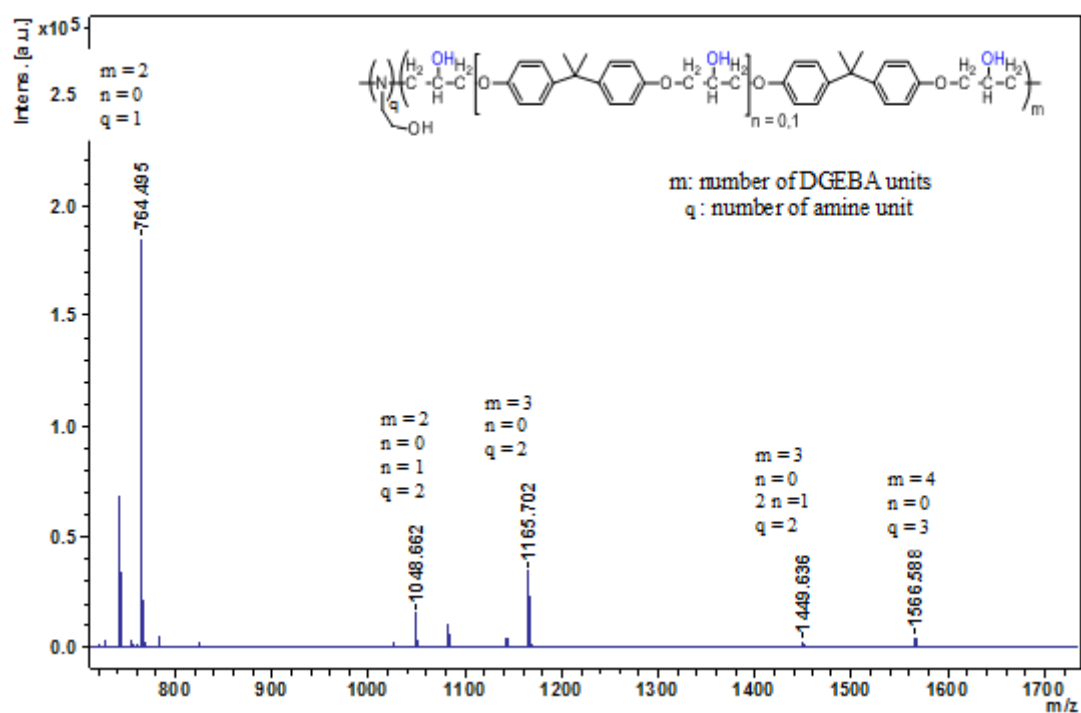

Figure S2. MALDI-TOF MS spectrum of DGEBA-EA / 1:0.3 cooligomer after 2 hrs.

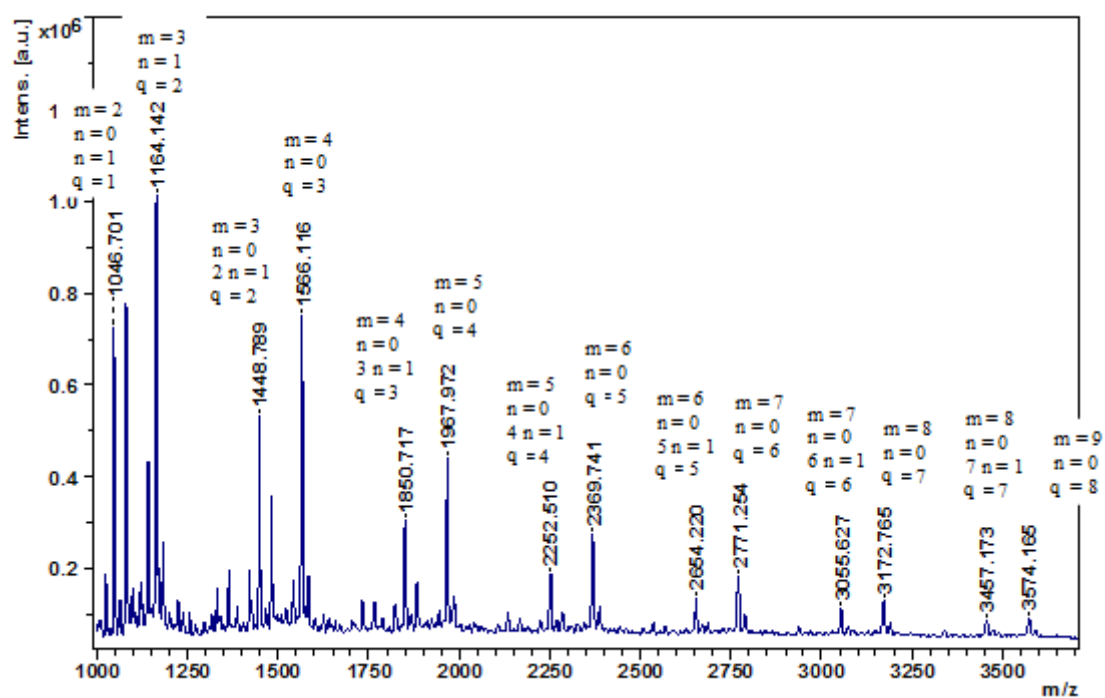

Figure S3. MALDI-TOF MS spectrum of DGEBA-EA / 1:0.3 cooligomer after 2 hrs in linear mode.

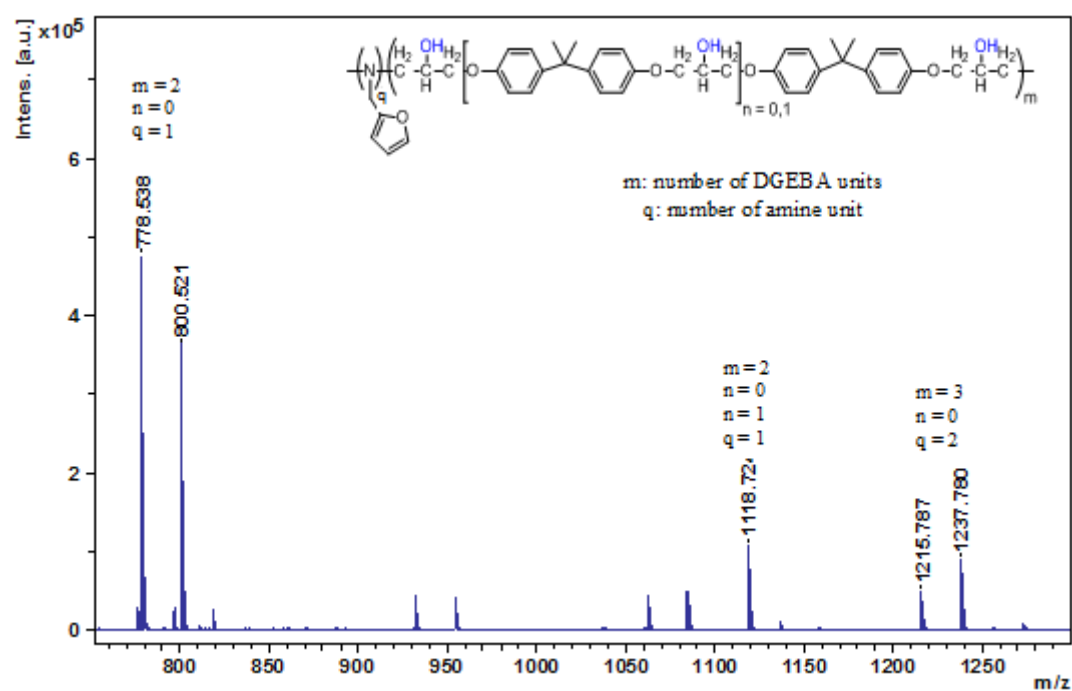

**Figure S4.** MALDI-TOF MS spectrum of DGEBA-FA / 1:0.1 cooligomer after 2 hrs.

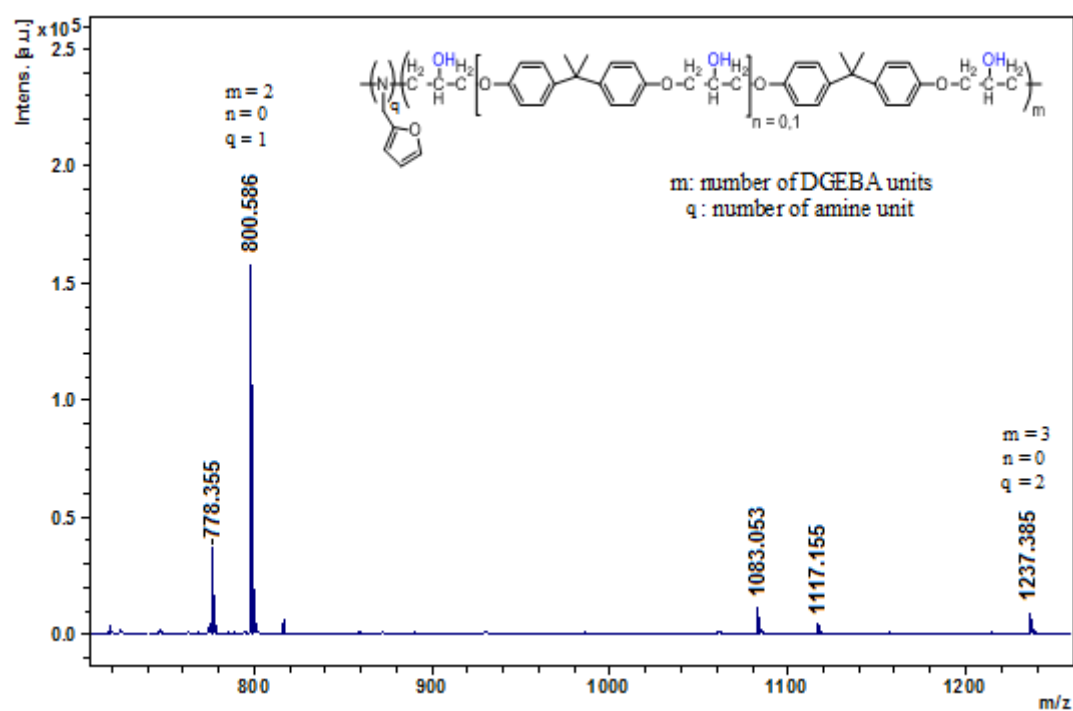

**Figure S5.** MALDI-TOF MS spectrum of DGEBA-FA / 1:0.2 cooligomer after 2 hrs.

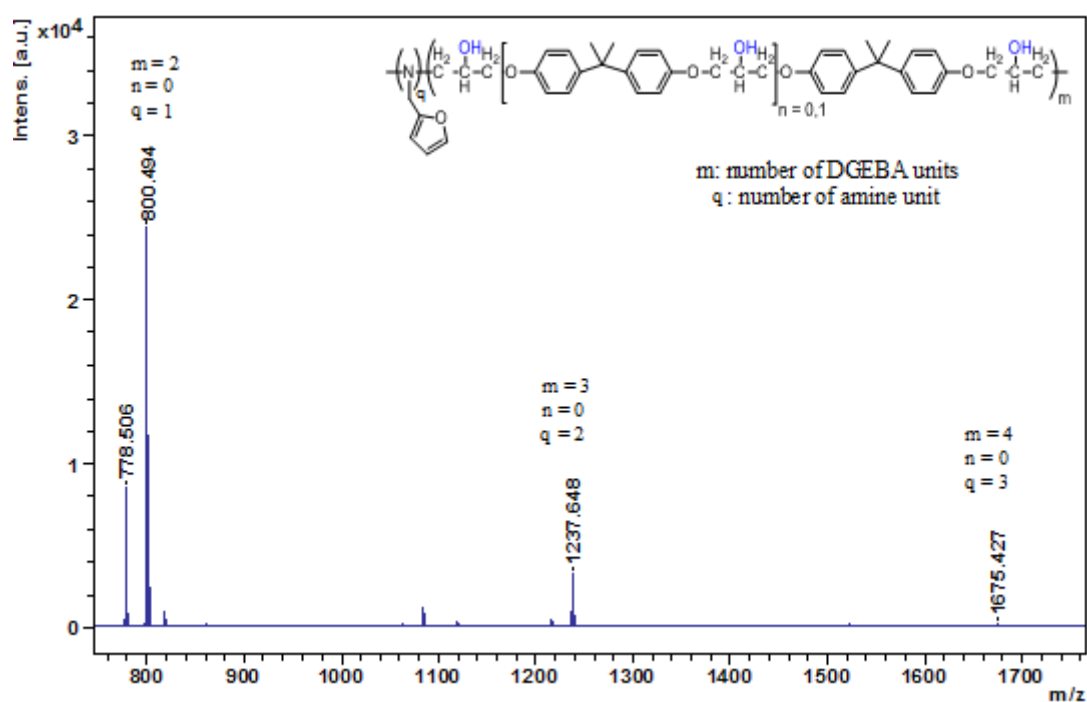

Figure S6. MALDI-TOF MS spectrum of DGEBA-FA / 1:0.3 cooligomer after 2 hrs.

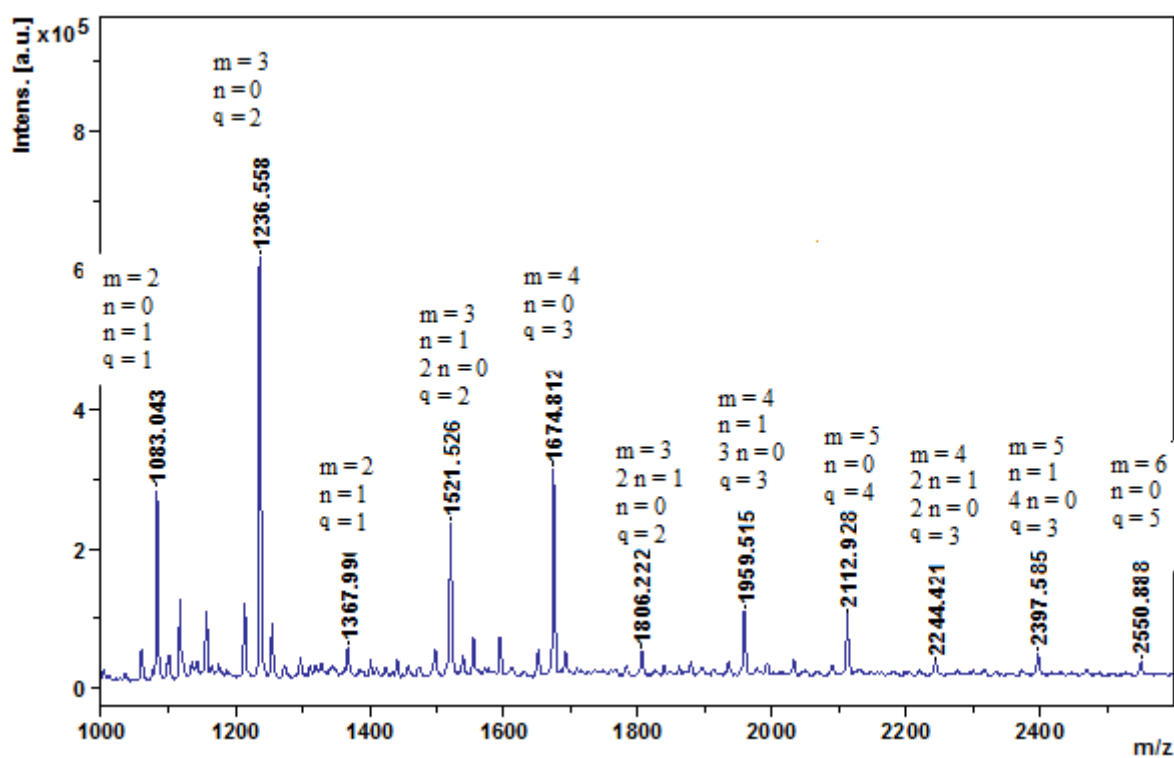

Figure S7. MALDI-TOF MS spectrum of DGEBA-FA / 1:0.3 cooligomer after 2 hrs in linear mode.

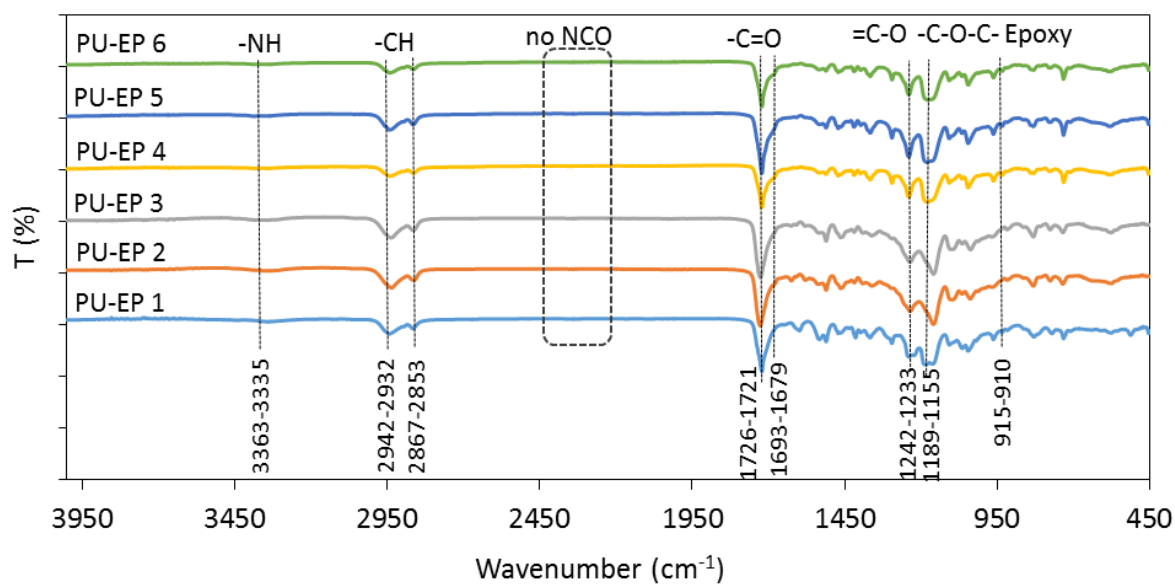

Figure S8. The IR spectra of PU-EPs 1-6.

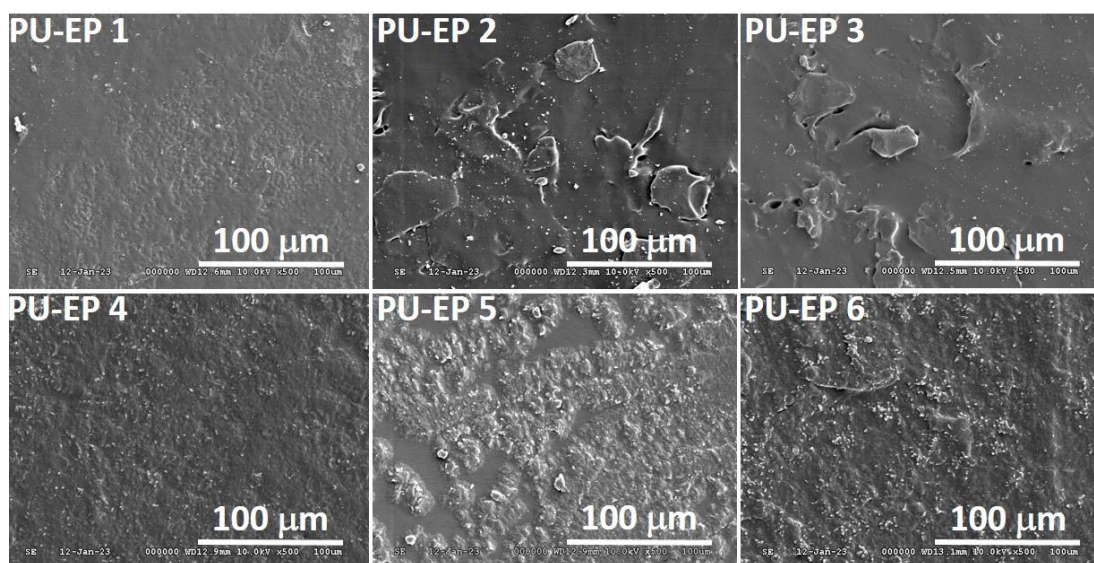

Figure S9. SEM images of samples PU-EPs 1-6.

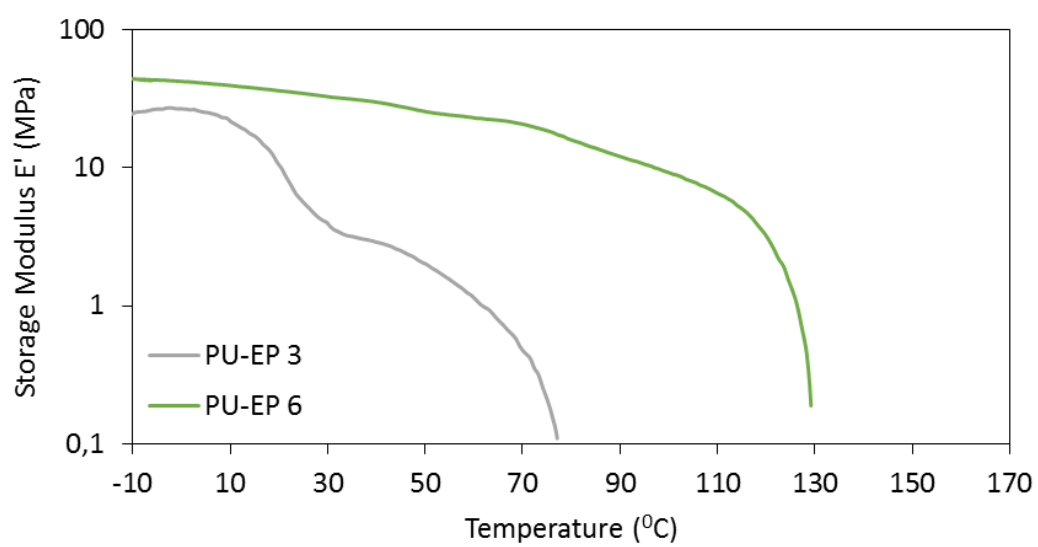

**Figure S10.** Storage modulus curves of PU-EPs 3 and 6.
